# Supplementary material for: The Pathogenicity of Anti-β2GP1-IgG Autoantibodies Depends on Fc Glycosylation
Source: Hindawi journal article supplement (doi:10.1155/2015/638129), 2015-01-01

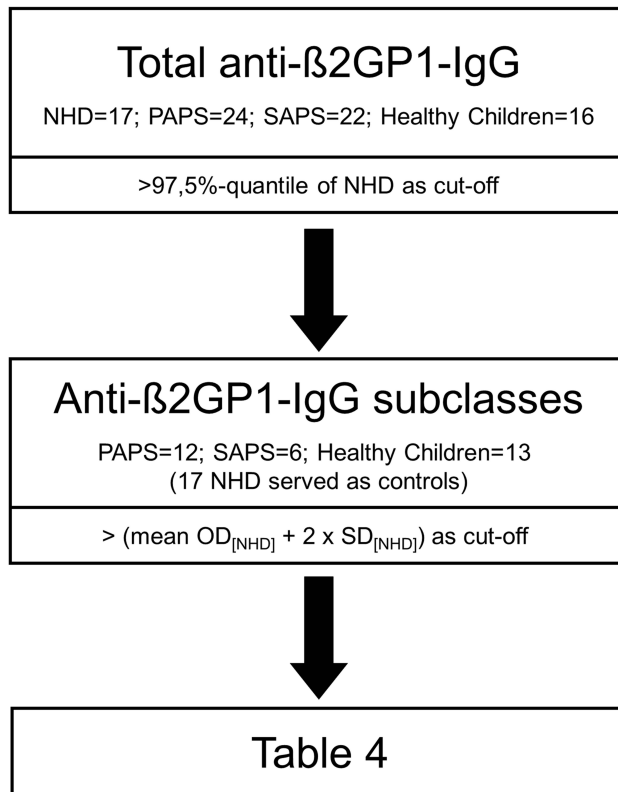

Supplement: f1 [file 638129.f1.pdf]
